# Supplementary material for: The reference electrode dilemma in energy conversion electrocatalysis: “right vs. okay vs. wrong”
Source: Royal Society of Chemistry journal article supplement (doi:10.1039/d3ta03145d), 2023-01-01
Supplement: d3ta03145d1.pdf [file d3ta03145d1.pdf]

## Electronic Supplementary Information

### The Reference Electrode Dilemma in Energy Conversion Electrocatalysis: “Right vs Okay vs Wrong”

Sengeni Anantharaj\*<sup>a,b,c</sup>, Prince JJ Sagayaraj<sup>d#</sup>, Manova Santhosh Yesupatham<sup>d#</sup>,  
Roshini Arulraj<sup>a</sup>, Karthik Eswaran<sup>a</sup>, Karthikeyan Sekar<sup>d</sup>, and Suguru Noda<sup>b,c</sup>

<sup>a</sup>Laboratory for Electrocatalysis and Energy, Department of Chemistry, Faculty of Engineering and Technology, SRM Institute of Science and Technology, Kattankulathur, Tamil Nadu 603 203, India

<sup>b</sup>Department of Applied Chemistry, School of Advanced Science and Engineering, Waseda University, 3-4-1 Okubo, Shinjuku-ku, Tokyo 169-8555, Japan

<sup>c</sup>Waseda Research Institute for Science and Engineering, Waseda University, 3-4-1 Okubo, Shinjuku-ku, Tokyo 169-8555, Japan

<sup>d</sup>Sustainable Energy and Environmental Research Laboratory, Department of Chemistry, Faculty of Engineering and Technology, SRM Institute of Science and Technology, Kattankulathur, Tamil Nadu 603 203, India

#These authors have contributed equally!

\*Correspondence should be addressed to: [ananthas@srmist.edu.in](mailto:ananthas@srmist.edu.in) and [anantharaj1402@gmail.com](mailto:anantharaj1402@gmail.com)

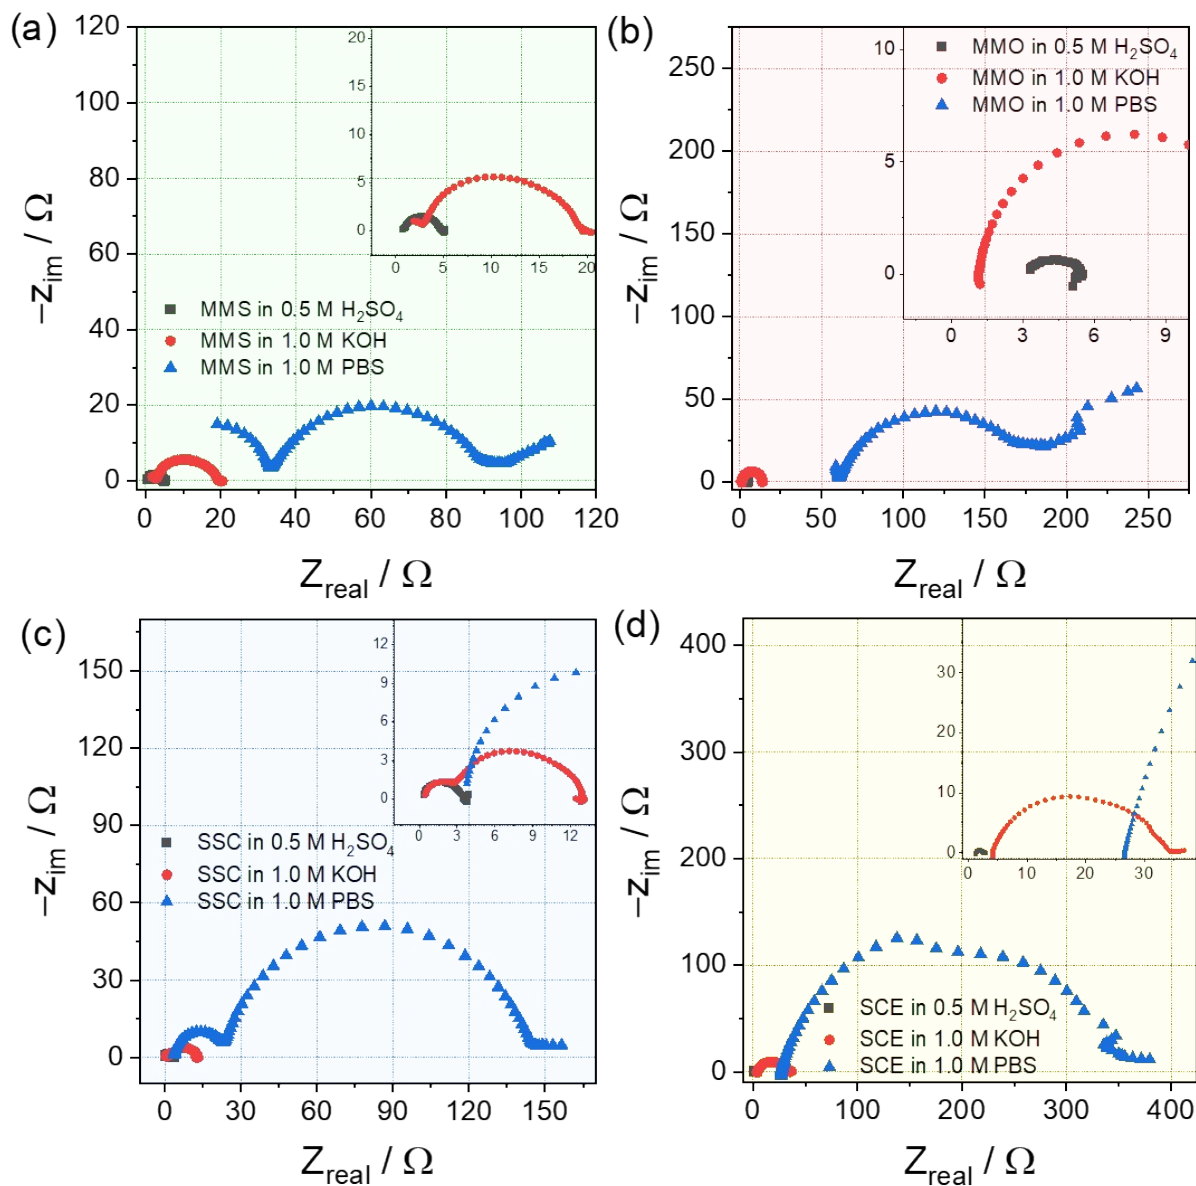

**Figure S1:** Nyquist plots of MMS (a), MMO (b), SSC (c), and SCE (d) reference electrodes acquired in 0.5 M  $H_2SO_4$  (black squares), 1.0 M KOH (red spheres), and 1.0 M PBS (blue pyramids).

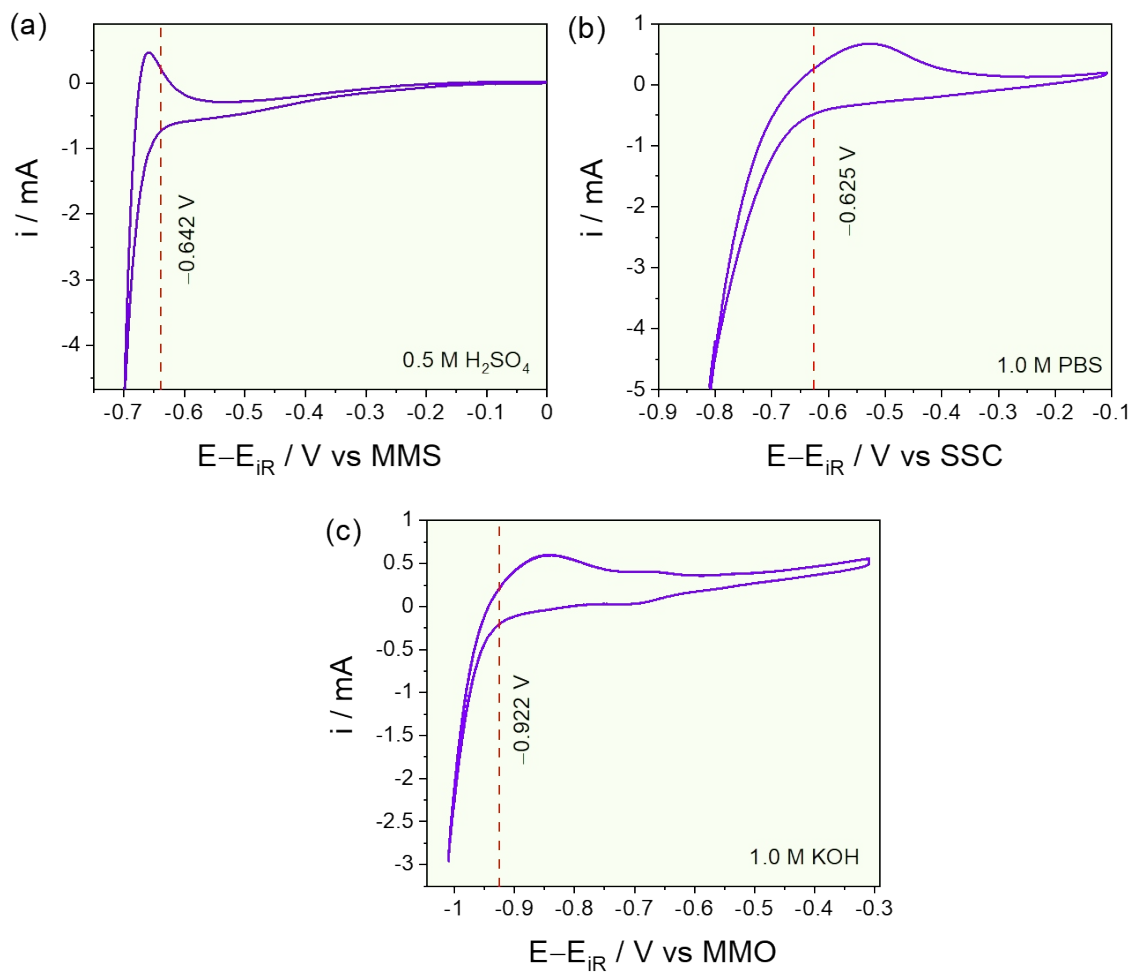

**Figure S2:** (a-c) HER CVs of Pt foil in 0.5 M H<sub>2</sub>SO<sub>4</sub>, 1.0 M PBS, and 1.0 M KOH screened against MMS, SSC, and MMO reference electrodes used for the calibration of the reference electrodes.

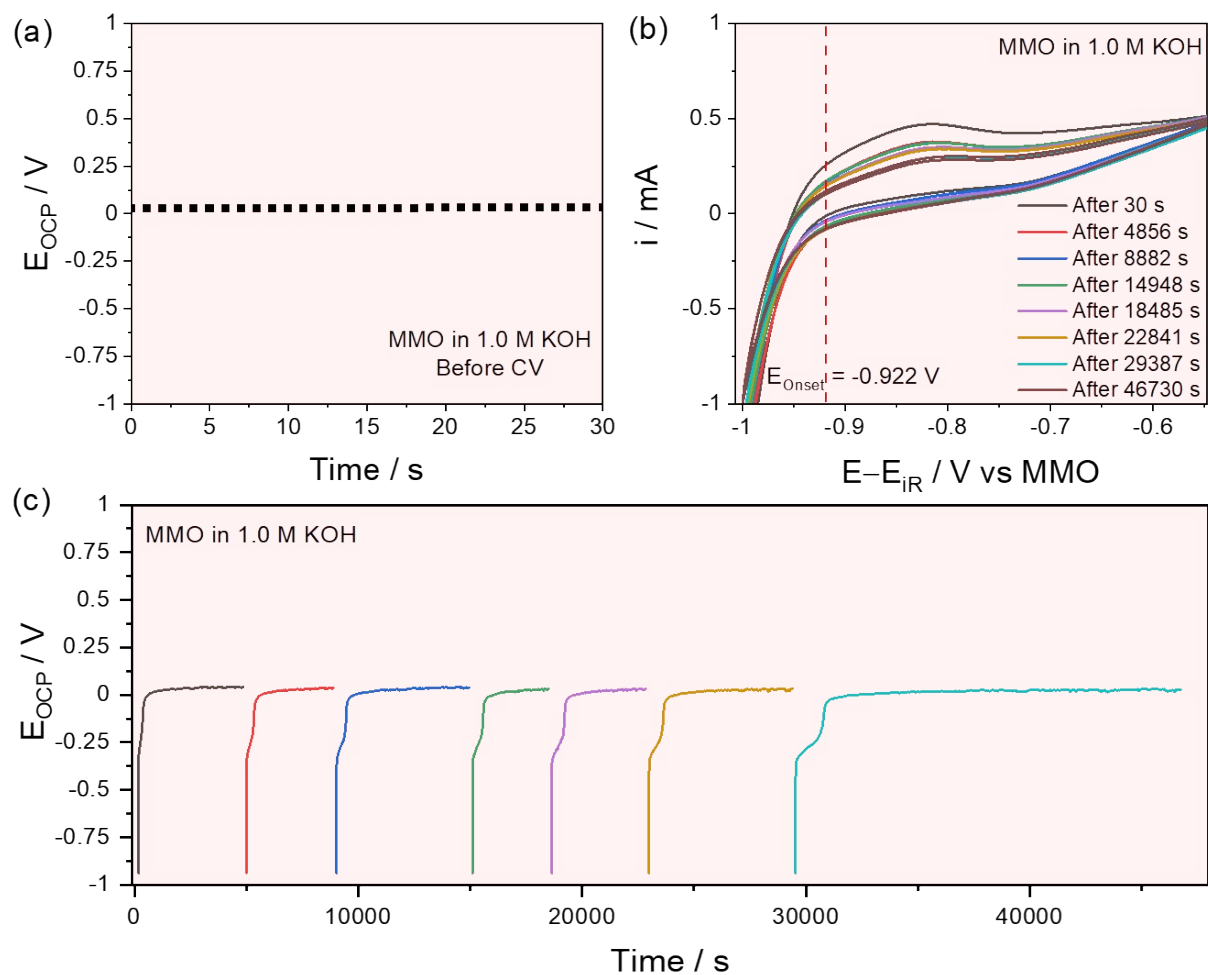

**Figure S3:** (a) Initial resting of electrodes for 30 s. (b) CVs recorded at random time intervals of monitoring OCP (c) for Pt foil against MMO in 1.0 M KOH.

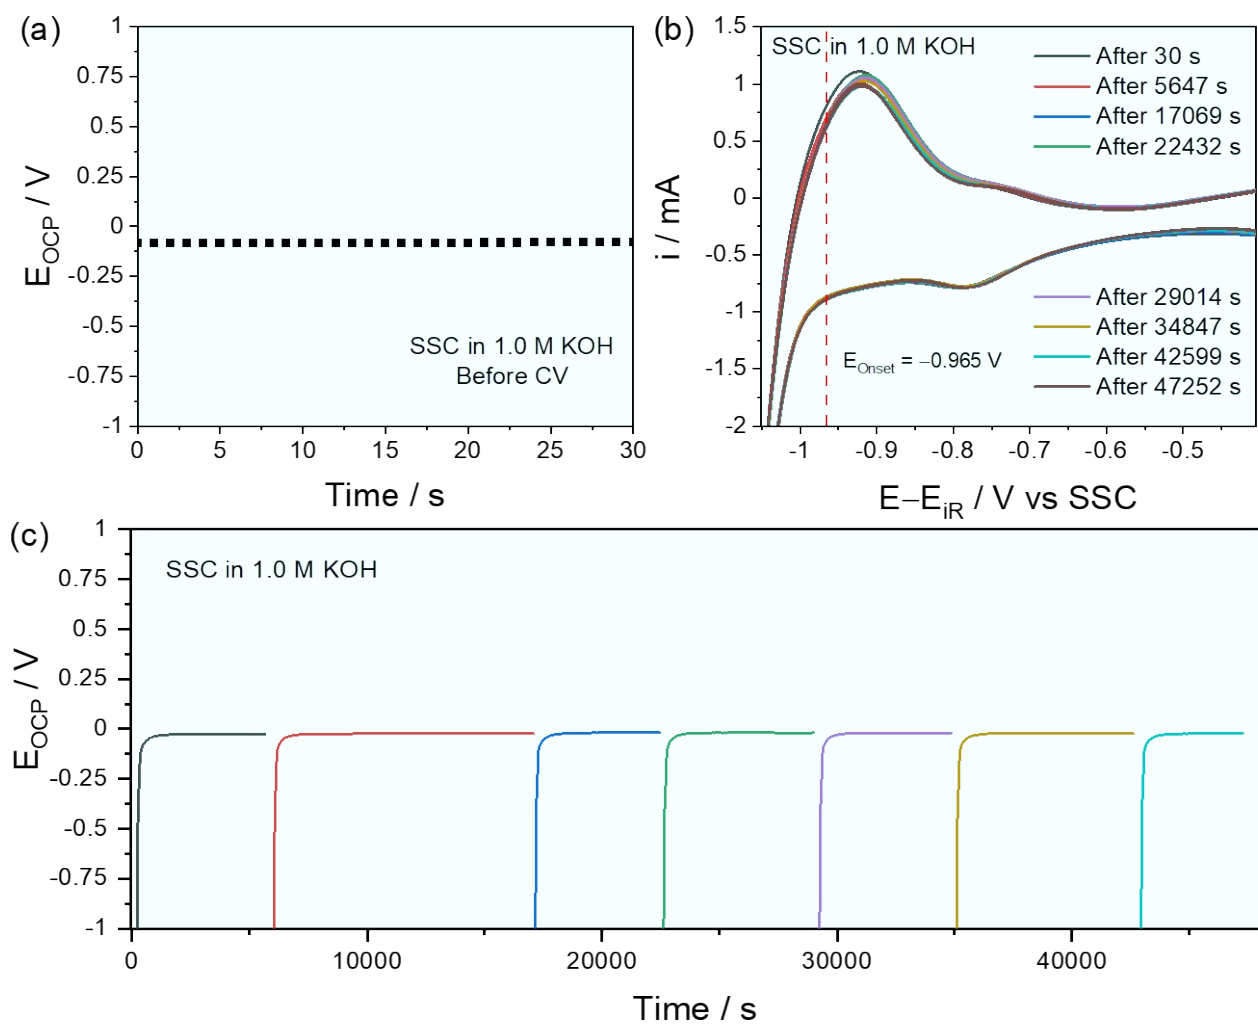

**Figure S4:** (a) Initial resting of electrodes for 30 s. (b) CVs recorded at random time intervals of monitoring OCP (c) for Pt foil against SSC in 1.0 M KOH.

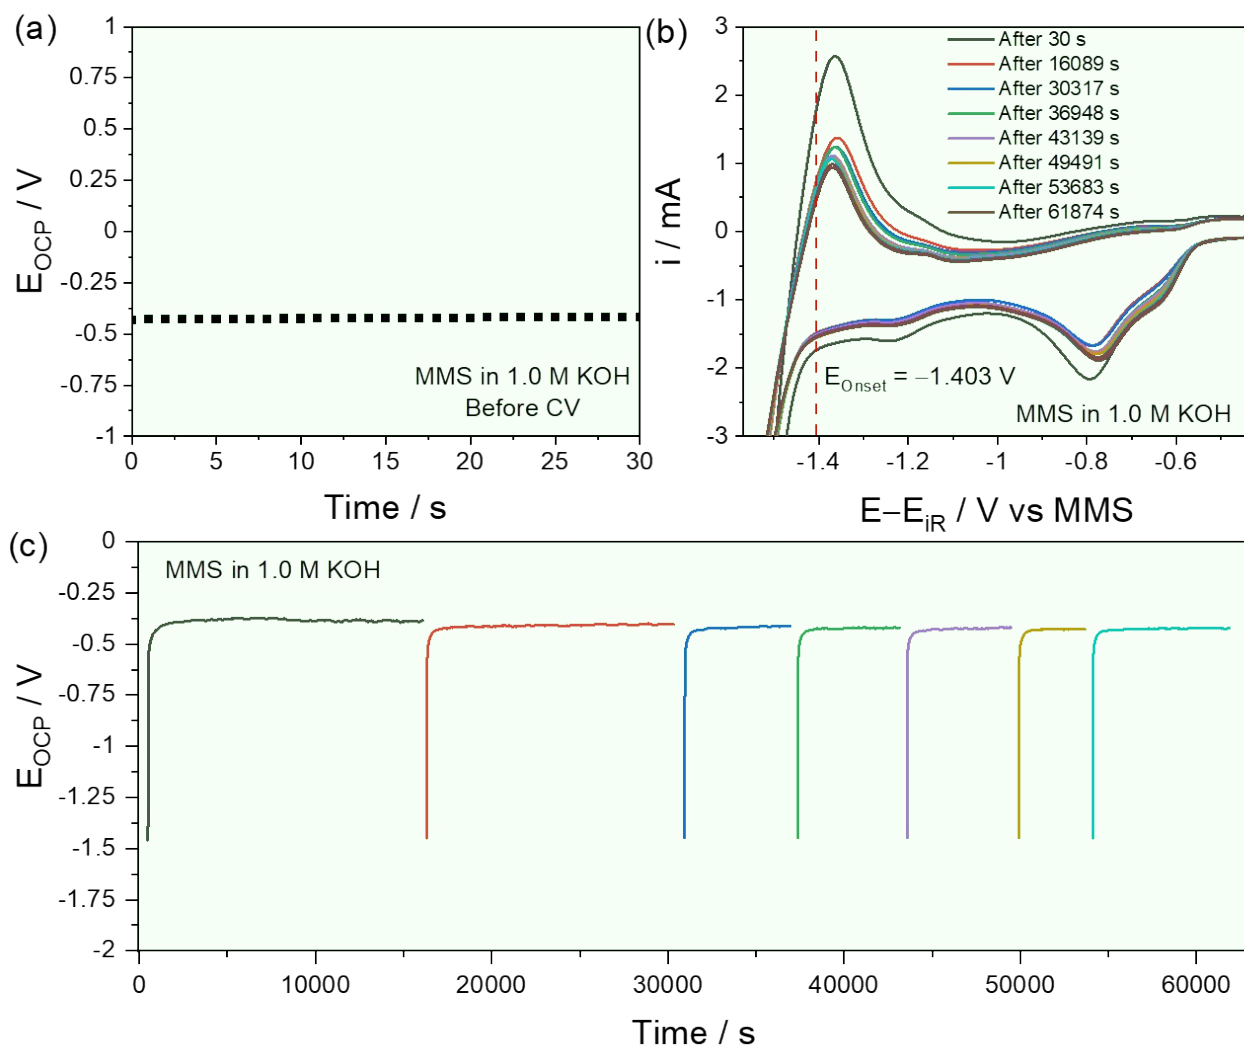

**Figure S5:** (a) Initial resting of electrodes for 30 s. (b) CVs recorded at random time intervals of monitoring OCP (c) for Pt foil against MMS in 1.0 M KOH.

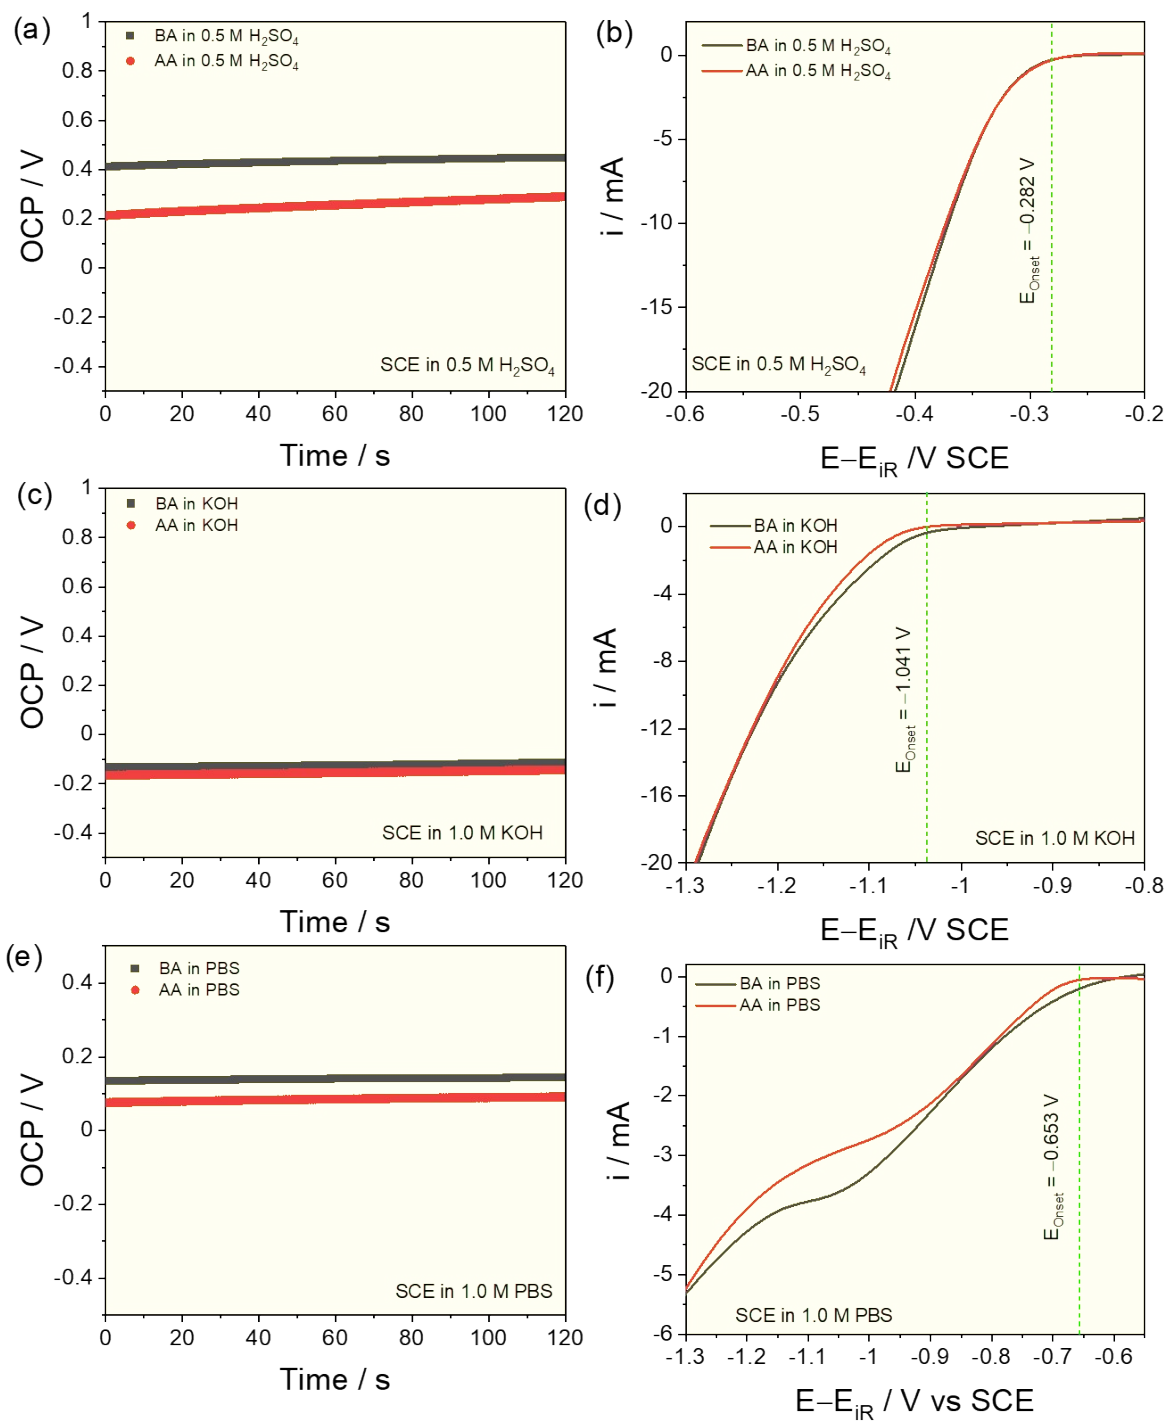

**Figure S6:** (a, c, e) OCP measurements made before and after 12 h aging for SCE, respectively in 0.5 M H<sub>2</sub>SO<sub>4</sub>, 1.0 M KOH, and 1.0 M PBS. (b, d, f) HER LSVs of Pt acquired against SCE under the same conditions, respectively.

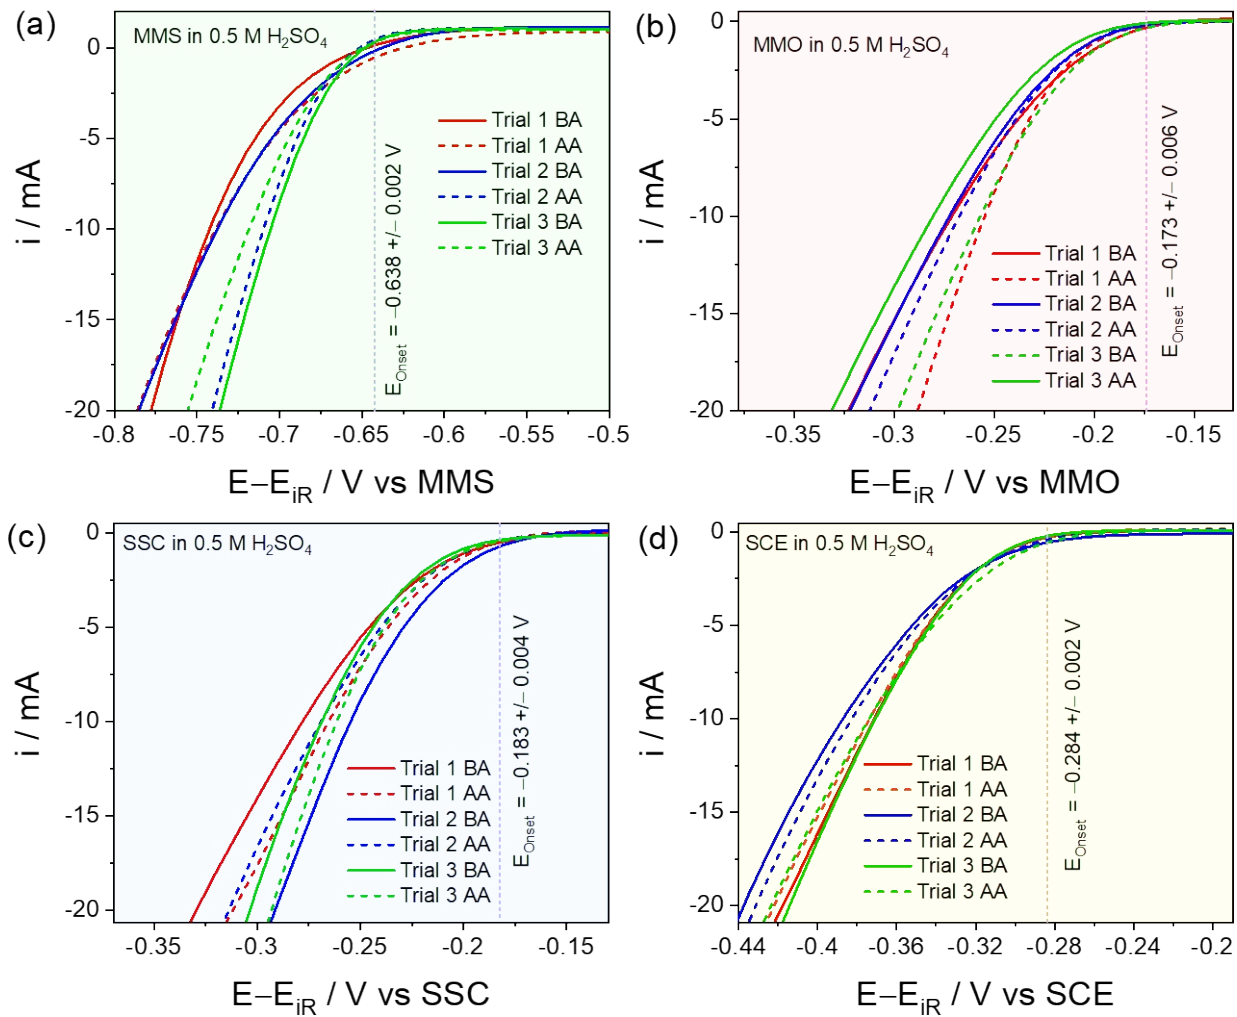

**Figure S7:** HER LSVs of Pt against MMS (a), MMO (b), SSC (c), and SCE (d) in 0.5 M H<sub>2</sub>SO<sub>4</sub>.



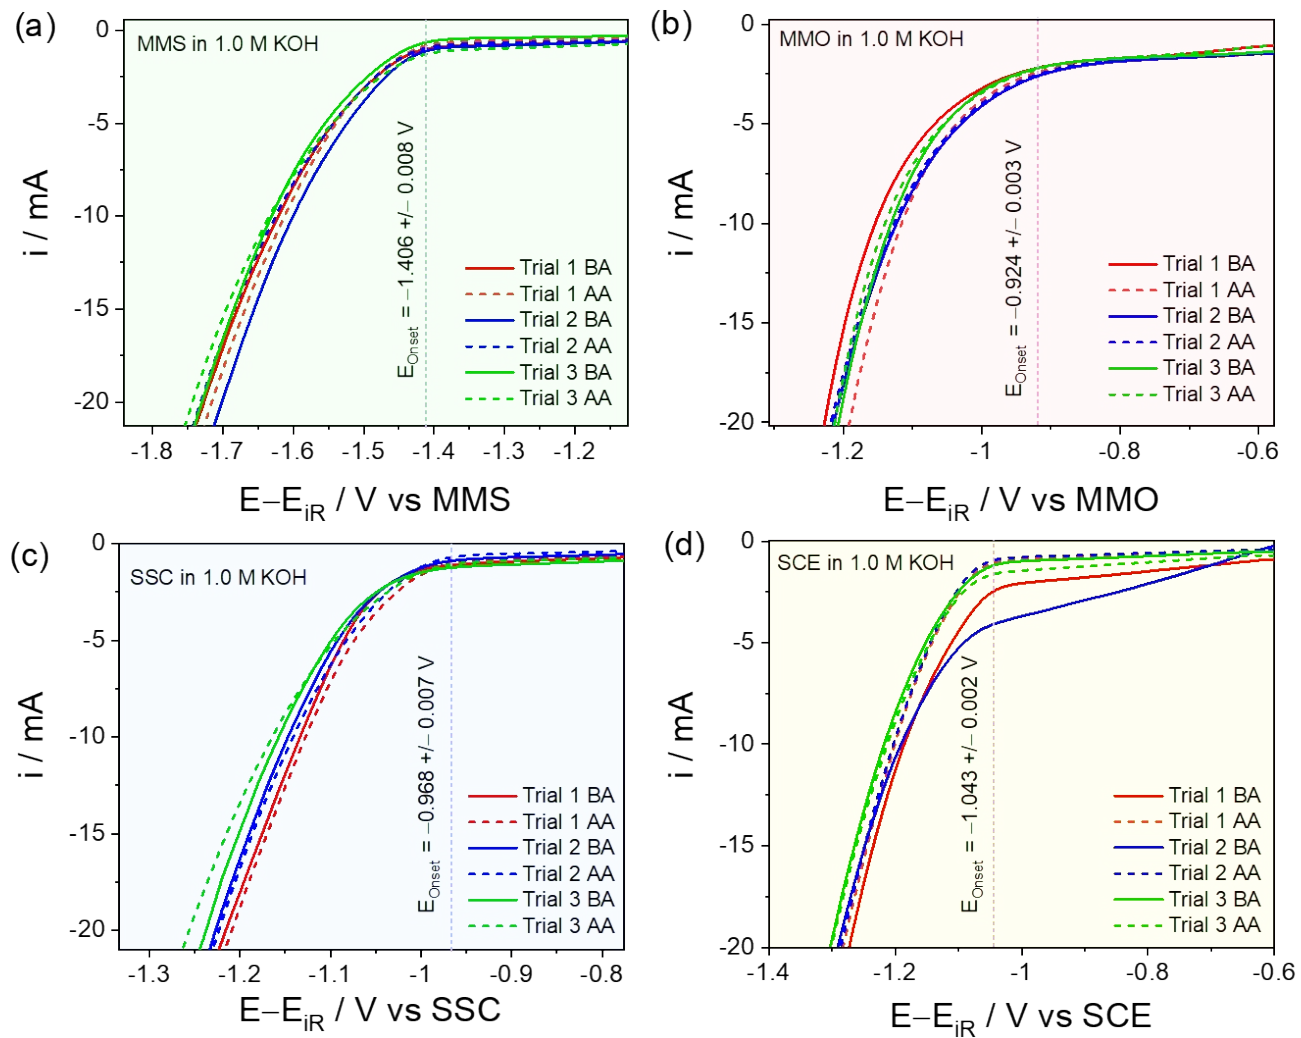

**Figure S8:** HER LSVs of Pt against MMS (a), MMO (b), SSC (c), and SCE (d) in 1.0 M KOH.

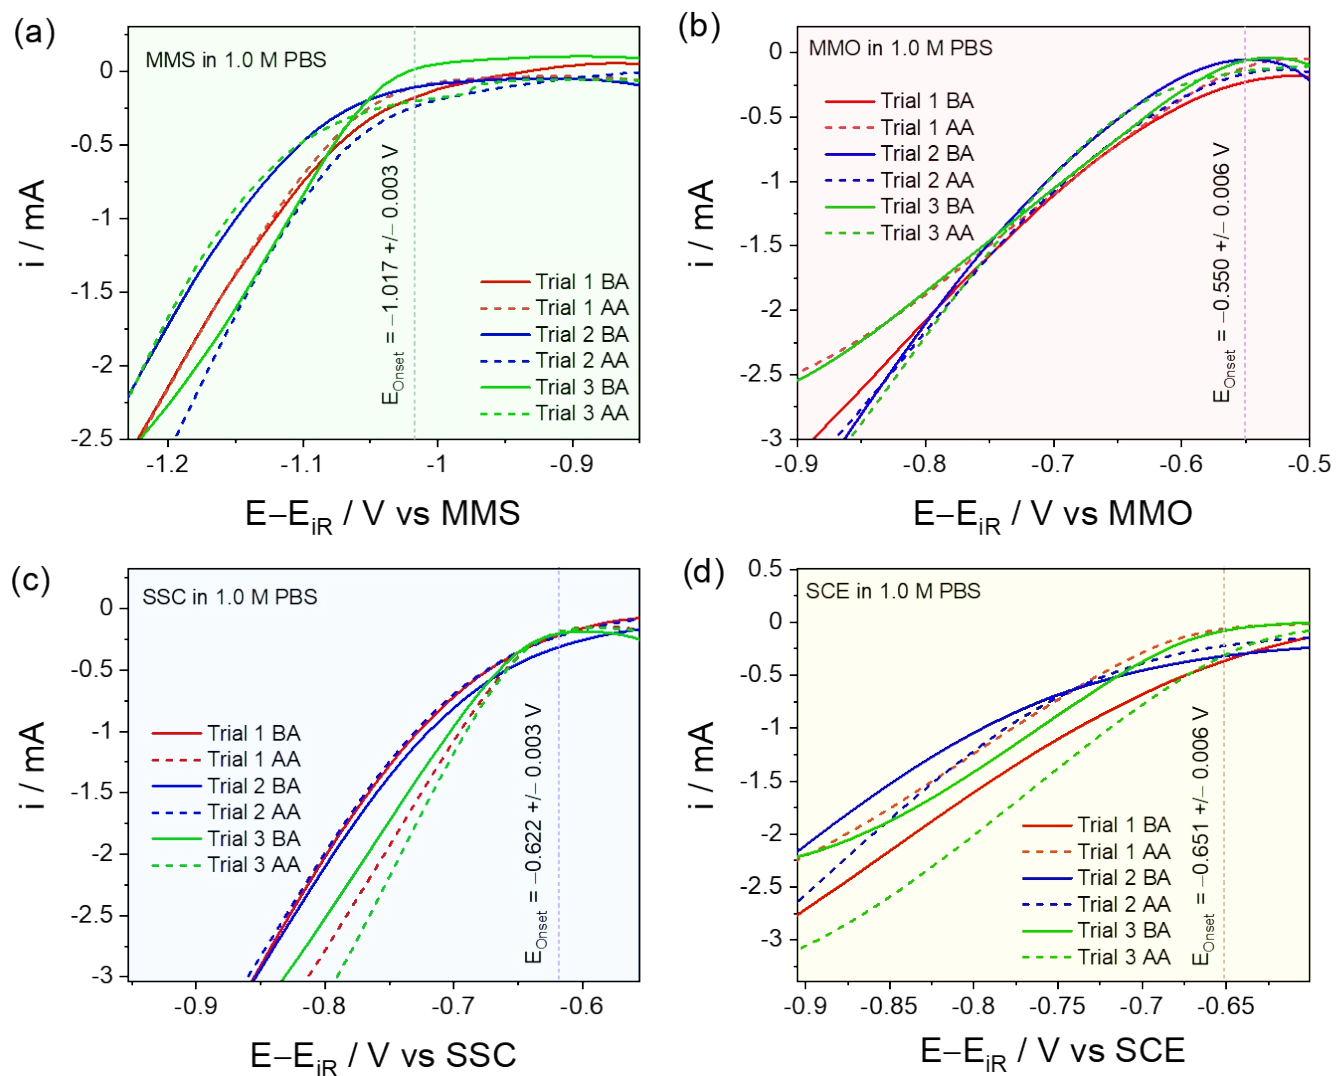

**Figure S9:** HER LSVs of Pt against MMS (a), MMO (b), SSC (c), and SCE (d) in 1.0 M PBS.
